# Supplementary material for: Avian community characteristics and demographics reveal how conservation value of regenerating tropical dry forest changes with forest age
Source: PubMed Central journal article supplement (PMC6044266; doi:10.7717/peerj.5217), 2018-07-10

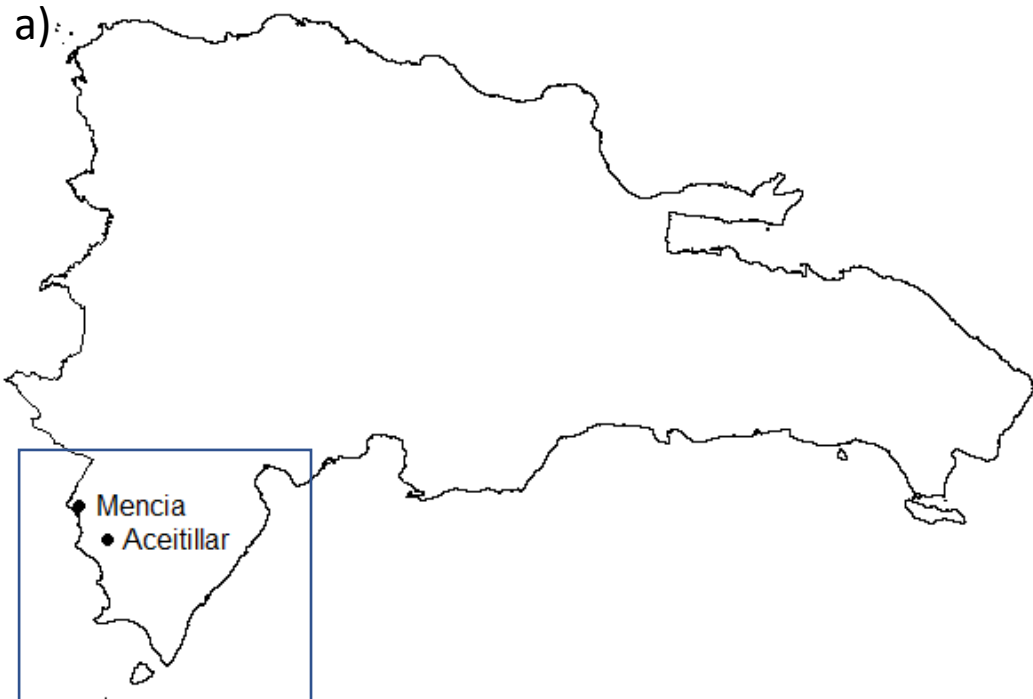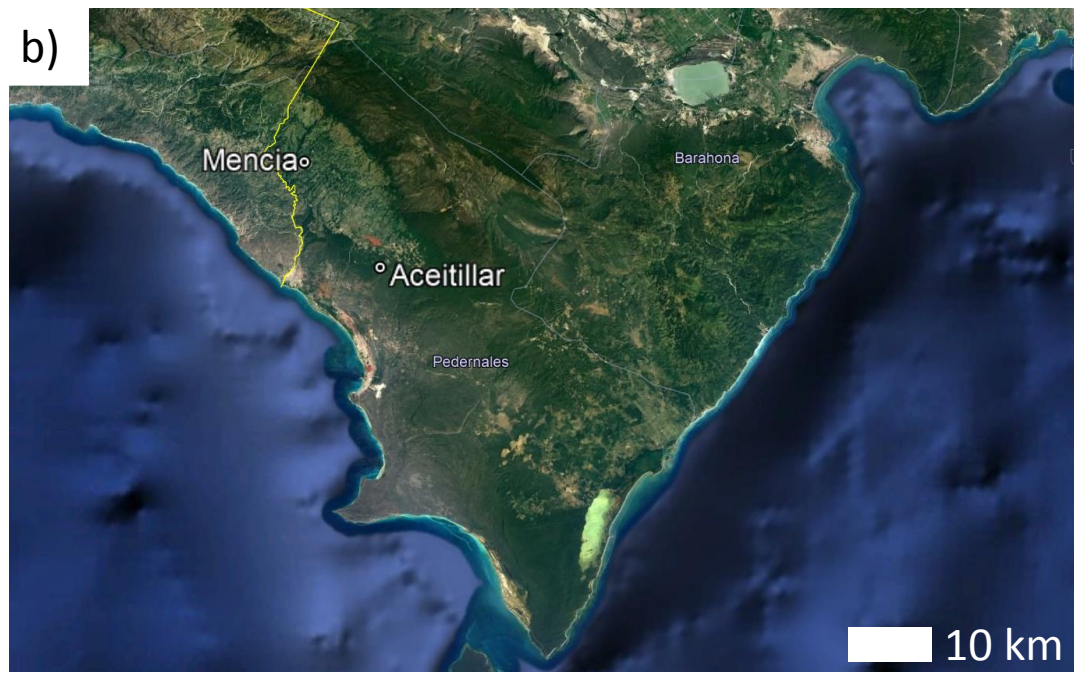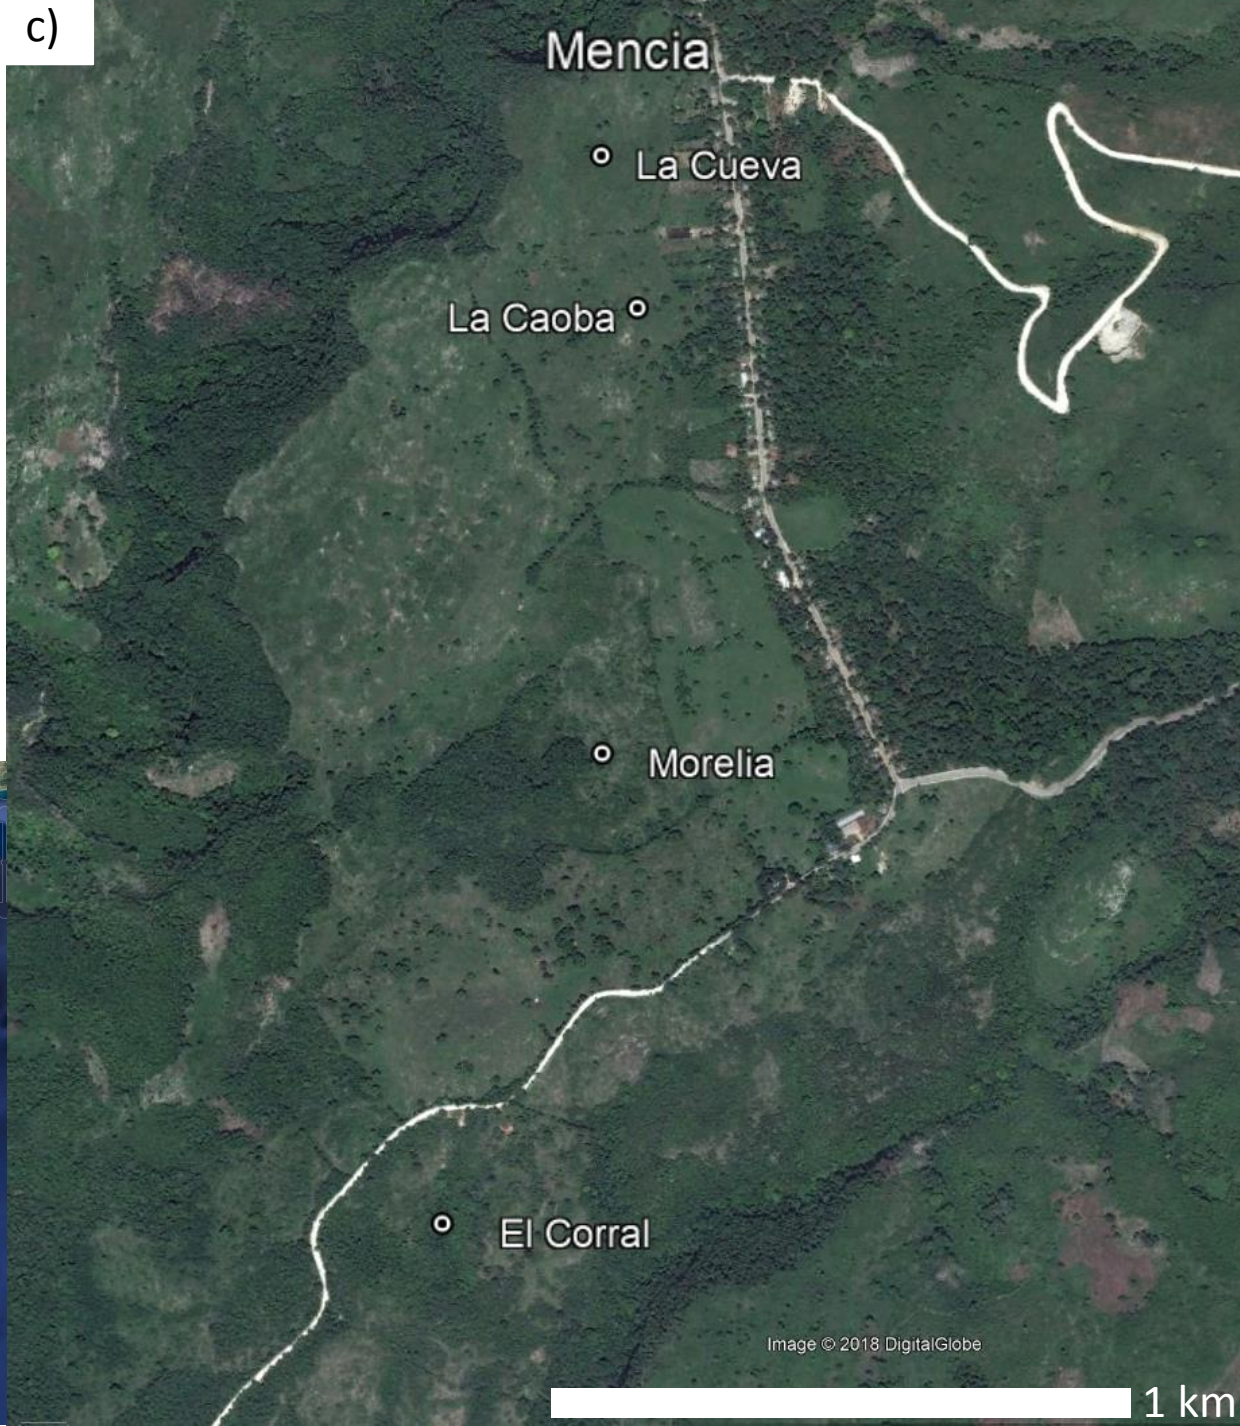

Supplement: peerj-06-5217-s001.pdf [file peerj-06-5217-s001.pdf]
